# Supplementary material for: IrSi3As3: a first transition metal arsenide non-linear optical material
Source: Royal Society of Chemistry journal article supplement (doi:10.1039/d2ta09313h), 2023-01-01
Supplement: d2ta09313h1.pdf [file d2ta09313h1.pdf]

Supporting Information

## IrSi<sub>3</sub>As<sub>3</sub>: First Transition Metal Arsenide Non-Linear Optical Material

Shannon J. Lee,<sup>a,b,c</sup> Georgiy Akopov,<sup>a,b,#</sup> Adedoyin N. Adeyemi,<sup>a</sup> Ernesto Soto,<sup>a,b</sup> Kui Wu,<sup>d</sup> Kirill Kovnir<sup>a,b\*</sup>

<sup>a</sup> Department of Chemistry, Iowa State University, Ames, Iowa 50011, USA. E-mail: kovnir@iastate.edu

<sup>b</sup> Ames Laboratory, U.S. Department of Energy, Ames, Iowa 50011, USA

<sup>c</sup> Brookhaven National Laboratory, U.S. Department of Energy, Upton, NY 11973, USA

<sup>d</sup> College of Chemistry and Environmental Science, Hebei University, Baoding 0710002, China

\* current address – Department of Chemistry, Rutgers University, Newark, New Jersey, USA

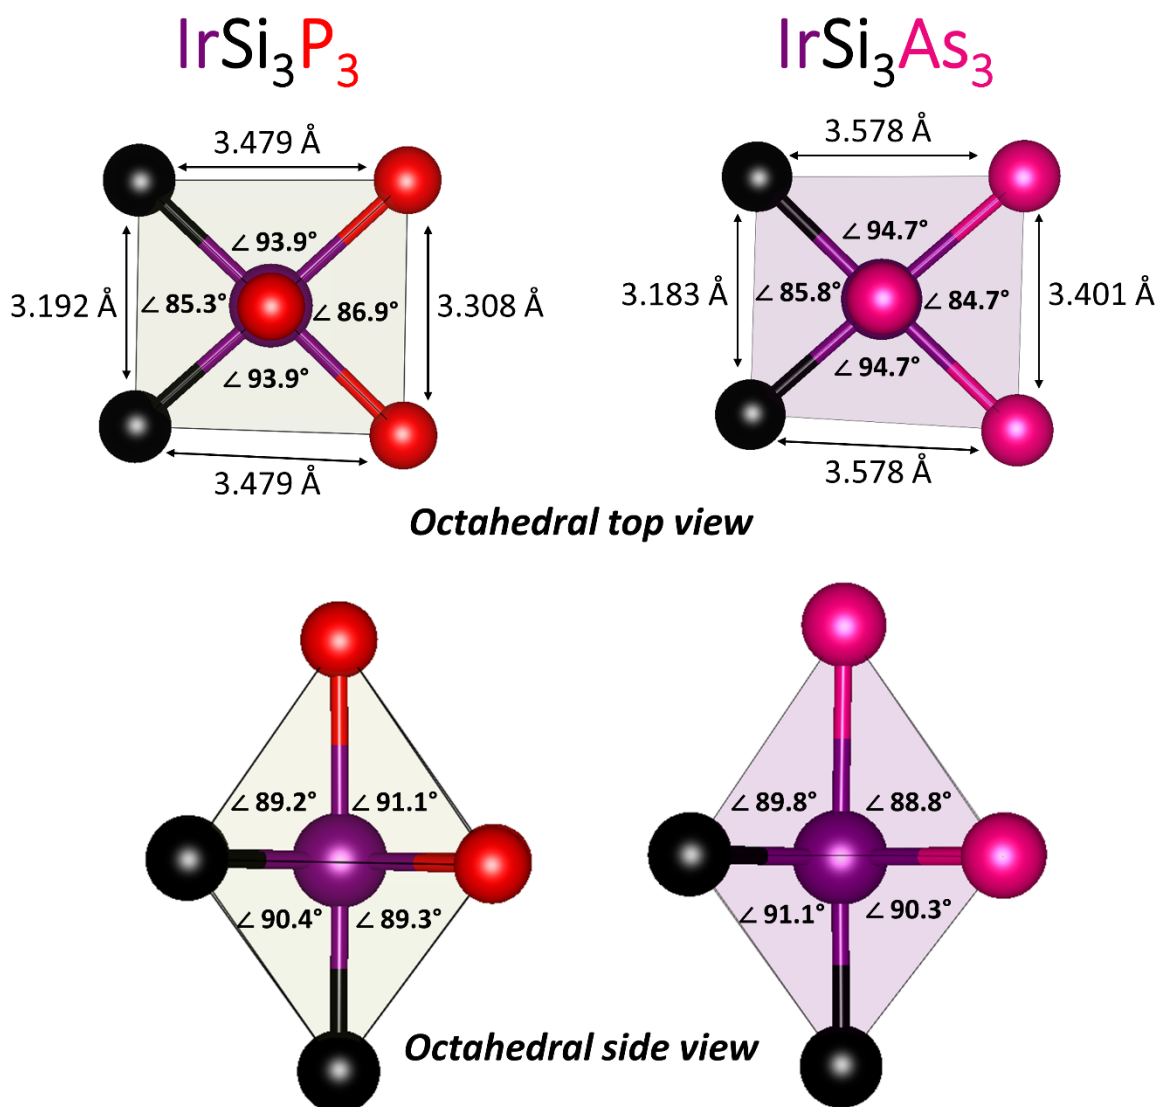

**Figure S1.** Distortions of octahedral building blocks compared for IrSi<sub>3</sub>P<sub>3</sub> and IrSi<sub>3</sub>As<sub>3</sub>.

**Table S1.** Octahedral and tetrahedral angles and deviations from ideal geometry for IrSi<sub>3</sub>P<sub>3</sub> and IrSi<sub>3</sub>As<sub>3</sub> structures.

| <b>Angle Labels using legend below</b><br>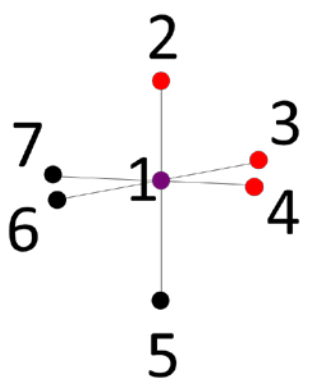 | <b>Angle (°)</b>                                                                                               | <b> Deviation from 90° </b>  |
|-----------------------------------------------------------------------------------------------------------------------------|----------------------------------------------------------------------------------------------------------------|------------------------------|
| $\angle 2-1-3 = \angle 2-1-4:$<br>IrSi <sub>3</sub> P <sub>3</sub><br>IrSi <sub>3</sub> As <sub>3</sub>                     | 91.06(6)<br>88.8162(3)                                                                                         | 1.06<br>1.18                 |
| $\angle 2-1-6 = \angle 2-1-7$<br>IrSi <sub>3</sub> P <sub>3</sub><br>IrSi <sub>3</sub> As <sub>3</sub>                      | 89.26(5)<br>89.7975(2)                                                                                         | 0.74<br>0.20                 |
| $\angle 5-1-3 = \angle 5-1-4$<br>IrSi <sub>3</sub> P <sub>3</sub><br>IrSi <sub>3</sub> As <sub>3</sub>                      | 89.28(6)<br>90.2890(3)                                                                                         | 0.72<br>0.29                 |
| $\angle 5-1-6 = \angle 5-1-7$<br>IrSi <sub>3</sub> P <sub>3</sub><br>IrSi <sub>3</sub> As <sub>3</sub>                      | 90.40(7)<br>91.0895(3)                                                                                         | 0.40<br>1.09                 |
| $\angle 3-1-4$<br>IrSi <sub>3</sub> P <sub>3</sub><br>IrSi <sub>3</sub> As <sub>3</sub>                                     | 86.92(7)<br>84.720(1)                                                                                          | 3.08<br>5.28                 |
| $\angle 4-1-6 = \angle 7-1-3$<br>IrSi <sub>3</sub> P <sub>3</sub><br>IrSi <sub>3</sub> As <sub>3</sub>                      | 93.90(5)<br>94.713(1)                                                                                          | 3.90<br>4.71                 |
| $\angle 6-1-7$<br>IrSi <sub>3</sub> P <sub>3</sub><br>IrSi <sub>3</sub> As <sub>3</sub>                                     | 85.28(7)<br>85.820(1)                                                                                          | 4.72<br>4.18                 |
|                                                                                                                             | <b>Sum of deviation of all angles</b><br>IrSi <sub>3</sub> P <sub>3</sub><br>IrSi <sub>3</sub> As <sub>3</sub> | <b>21.44</b><br><b>24.40</b> |

| <p>Angle Labels using legend below</p> 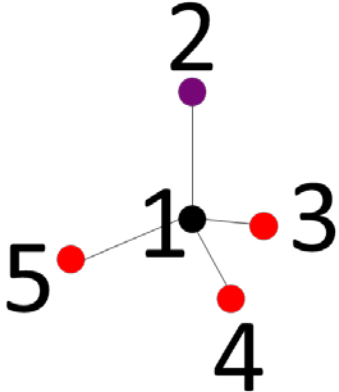 | <p>Angle (°)<br/>Si1 centered   Si2 centered</p>                                                                  | <p> Deviation from 109.5°  </p>        |
|--------------------------------------------------------------------------------------------------------------------------|-------------------------------------------------------------------------------------------------------------------|----------------------------------------|
| <p>∠ 2-1-3<br/>IrSi<sub>3</sub>P<sub>3</sub><br/>IrSi<sub>3</sub>As<sub>3</sub></p>                                      | <p>116.47(7)   110.34(9)<br/>117.8097(7)   111.8321(4)</p>                                                        | <p>6.97   0.84<br/>8.31   2.33</p>     |
| <p>∠ 2-1-4:<br/>IrSi<sub>3</sub>P<sub>3</sub><br/>IrSi<sub>3</sub>As<sub>3</sub></p>                                     | <p>109.64(7)   128.12(1)<br/>111.0572(8)   129.5553(9)</p>                                                        | <p>0.14   18.62<br/>1.56   20.06</p>   |
| <p>∠ 2-1-5:<br/>IrSi<sub>3</sub>P<sub>3</sub><br/>IrSi<sub>3</sub>As<sub>3</sub></p>                                     | <p>129.43(8)   110.34(9)<br/>130.1373(7)   111.8321(4)</p>                                                        | <p>19.93   0.84<br/>20.65   2.33</p>   |
| <p>∠ 3-1-4<br/>IrSi<sub>3</sub>P<sub>3</sub><br/>IrSi<sub>3</sub>As<sub>3</sub></p>                                      | <p>105.67(8)   94.42(1)<br/>103.1513(5)   93.0229(9)</p>                                                          | <p>3.83   15.08<br/>6.35   16.48</p>   |
| <p>∠ 4-1-5<br/>IrSi<sub>3</sub>P<sub>3</sub><br/>IrSi<sub>3</sub>As<sub>3</sub></p>                                      | <p>96.92(9)   94.42(1)<br/>95.4400(7)   93.0229(9)</p>                                                            | <p>12.58   15.08<br/>14.06   16.48</p> |
| <p>∠ 5-1-3<br/>IrSi<sub>3</sub>P<sub>3</sub><br/>IrSi<sub>3</sub>As<sub>3</sub></p>                                      | <p>95.24(6)   118.90(1)<br/>94.535(1)   116.1872(7)</p>                                                           | <p>14.26   9.40<br/>14.97   6.69</p>   |
|                                                                                                                          | <p><b>Sum of deviation of all angles</b><br/>IrSi<sub>3</sub>P<sub>3</sub><br/>IrSi<sub>3</sub>As<sub>3</sub></p> | <p><b>117.57</b><br/><b>130.27</b></p> |

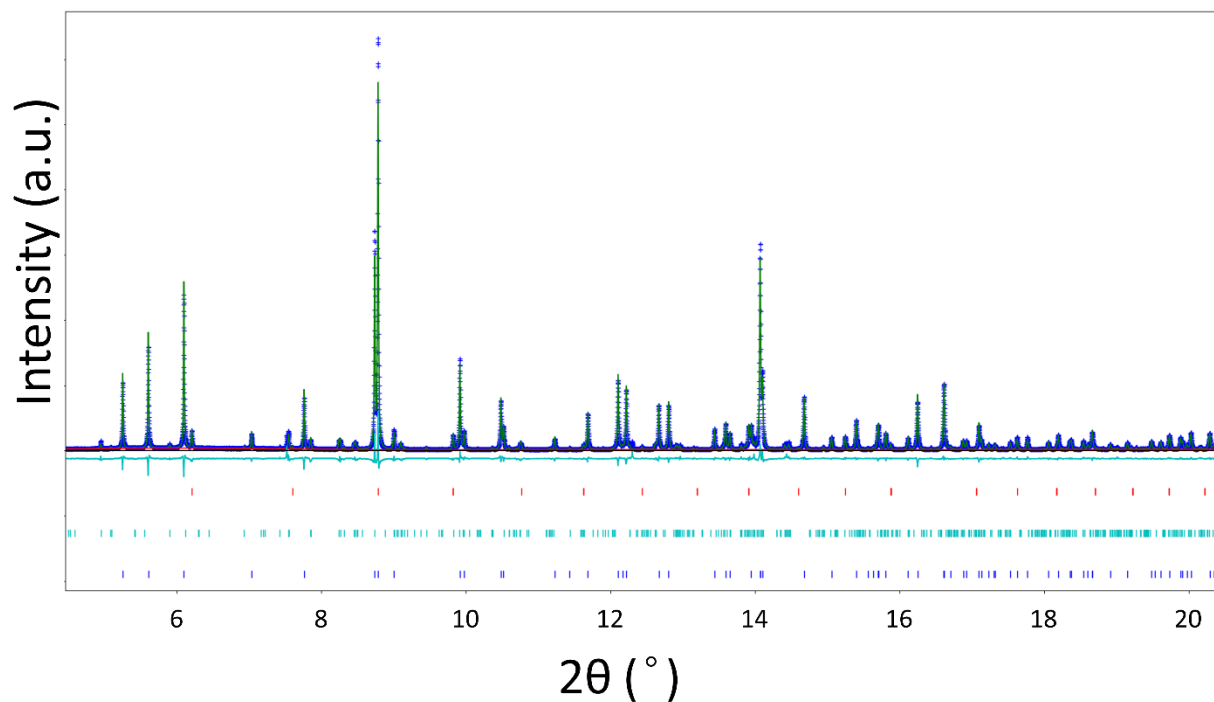

**Figure S2.** Rietveld refinement with main phase IrSi<sub>3</sub>As<sub>3</sub> (phase fraction (p.f.) of 0.96; shown as dark blue tick marks), and admixture phases IrAs<sub>3</sub> (p.f. 0.02; red tick marks) and Ir<sub>3</sub>Si<sub>5</sub> (p.f. 0.02; light blue tick marks) included. Difference curve shown in light blue,  $\chi^2 = 2.0$ ,  $wR = 10.7\%$ .

**Table S2.** Atomic positions of Rietveld refined IrSi<sub>3</sub>As<sub>3</sub> structural model with values in parentheses from the original single crystal X-ray diffraction structural solution.

| Atom label | Wyckoff label | $x/a$                | $y/b$                | $z/c$                | $U_{iso}$          |
|------------|---------------|----------------------|----------------------|----------------------|--------------------|
| Ir         | $2a$          | 0.18447<br>(0.18633) | 0                    | 0.21214<br>(0.21623) | 0.0004<br>(0.0013) |
| Si1        | $4b$          | 0.61772<br>(0.61840) | 0.28712<br>(0.28840) | 0.88150<br>(0.88420) | 0.0025<br>(0.0022) |
| Si2        | $2a$          | 0.57094<br>(0.57240) | 0                    | 0.34589<br>(0.35160) | 0.0025<br>(0.0036) |
| As1        | $2a$          | 0.75670<br>(0.75910) | 0                    | 0.07415<br>(0.07930) | 0.0011<br>(0.0003) |
| As2        | $4b$          | 0.74726<br>(0.74850) | 0.27258<br>(0.27197) | 0.56891<br>(0.57180) | 0.0011<br>(0.0008) |

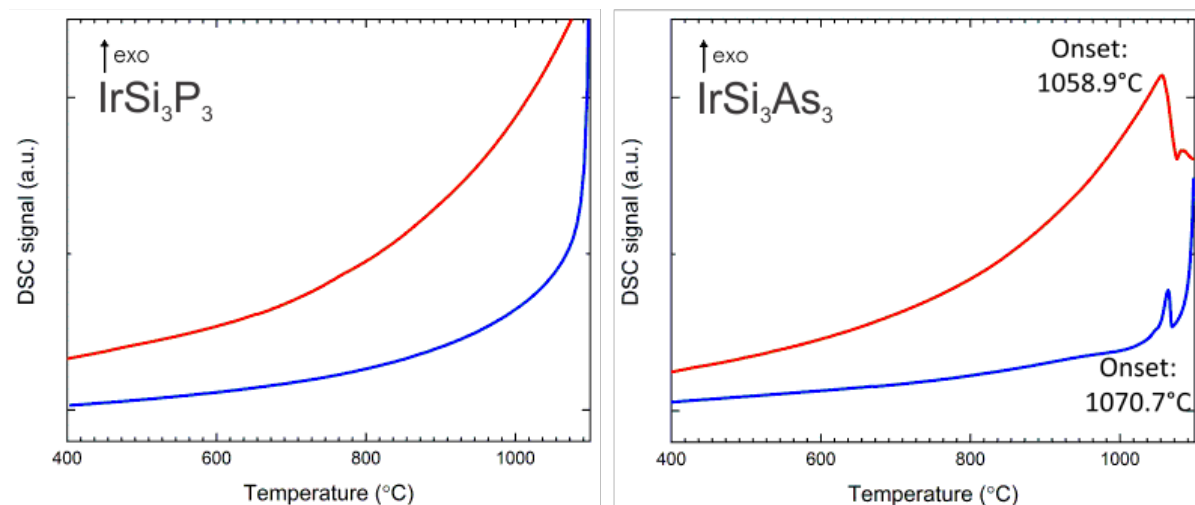

**Figure S3.** Differential scanning calorimetry plots of  $\text{IrSi}_3\text{P}_3$  and  $\text{IrSi}_3\text{As}_3$  with decomposition temperature onsets at  $1059^{\circ}\text{C}$  (upon heating – red curve) and  $1071^{\circ}\text{C}$  (upon cooling – blue curve).

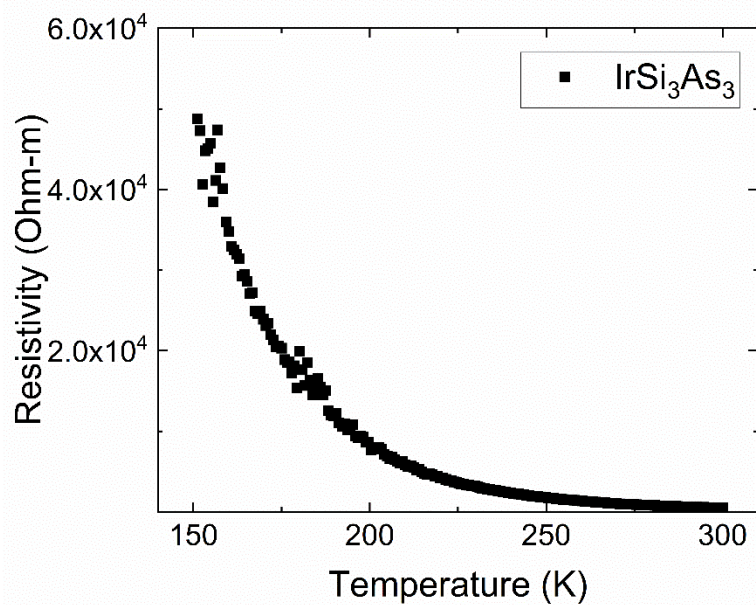

**Figure S4.** Electrical resistivity of sintered pellet of  $\text{IrSi}_3\text{As}_3$  (150-300 K).
